# Supplementary material for: High-valent osmium iminoxolene complexes
Source: Royal Society of Chemistry journal article supplement (doi:10.1039/d0dt01735c), 2020-01-01
Supplement: d0dt01735c1.pdf [file d0dt01735c1.pdf]

## Electronic Supporting Information for High-valent osmium iminoxolene complexes

Jacqueline Gianino, Alexander N. Erickson, Sean J. Markovitz and Seth  
N. Brown\*

251 Nieuwland Science Hall  
Department of Chemistry and Biochemistry  
University of Notre Dame  
Notre Dame, Indiana 46556-5670 USA  
E-mail: Seth.N.Brown.114@nd.edu

### Contents:

|             |                                                                                                                                                     |     |
|-------------|-----------------------------------------------------------------------------------------------------------------------------------------------------|-----|
| <b>I.</b>   | <b>Figure S1.</b> $^1\text{H}$ NMR of $(^{\text{H}}\text{ap})_2\text{OsCl}_2$                                                                       | S2  |
| <b>II.</b>  | <b>Figure S2.</b> Thermal ellipsoid plot of $\text{C}_2\text{H}_4(\text{O}_2\text{CC}_6\text{H}_4\text{-2-NH}_2)_2$                                 | S3  |
| <b>III.</b> | <b>Optical Spectroscopy</b>                                                                                                                         |     |
| <b>A.</b>   | Figure S3. Optical spectra of $(^{\text{R}}\text{ap})_2\text{OsO}$                                                                                  | S4  |
| <b>B.</b>   | Figure S4. Optical spectra of $(^{\text{H}}\text{ap})_2\text{Os}(\text{OCH}_2\text{CH}_2\text{O})$ and $(^{\text{H}}\text{ap})_2\text{OsCl}_2$      | S5  |
| <b>IV.</b>  | <b>Electrochemistry</b>                                                                                                                             |     |
| <b>A.</b>   | Figure S5. Cyclic voltammogram of $(\text{Egan})\text{OsO}$                                                                                         | S6  |
| <b>B.</b>   | Figure S6. Cyclic voltammogram of $(^{\text{H}}\text{ap})\text{OsO}(\text{pin})$                                                                    | S7  |
| <b>C.</b>   | Figure S7. Cyclic voltammograms of $(^{\text{H}}\text{ap})_2\text{Os}(\text{OCH}_2\text{CH}_2\text{O})$ and $(^{\text{H}}\text{ap})_2\text{OsCl}_2$ | S8  |
| <b>V.</b>   | <b>Energies and Cartesian coordinates of calculated structures</b>                                                                                  |     |
| <b>A.</b>   | $(^{\text{H}}\text{ap})_2\text{OsO}$                                                                                                                | S9  |
| <b>B.</b>   | $(^{\text{H}}\text{ap})_2\text{Os}(\text{OCH}_2\text{CH}_2\text{O})$ ( <i>cis</i> - $\alpha$ , N trans)                                             | S10 |
| <b>C.</b>   | $(^{\text{H}}\text{ap})_2\text{OsCl}_2$ ( <i>cis</i> - $\alpha$ , O trans)                                                                          | S11 |
| <b>D.</b>   | $(^{\text{H}}\text{ap})\text{OsO}(\text{OCH}_2\text{CH}_2\text{O})$                                                                                 | S12 |
| <b>E.</b>   | $(\text{Egan})\text{OsO}$                                                                                                                           | S13 |

I. **Figure S1.**  $^1\text{H}$  NMR spectrum (*tert*-butyl region) of  $(^{\text{H}}\text{ap})_2\text{OsCl}_2$  ( $\text{C}_6\text{D}_6$ , 400 MHz, 22 °C).

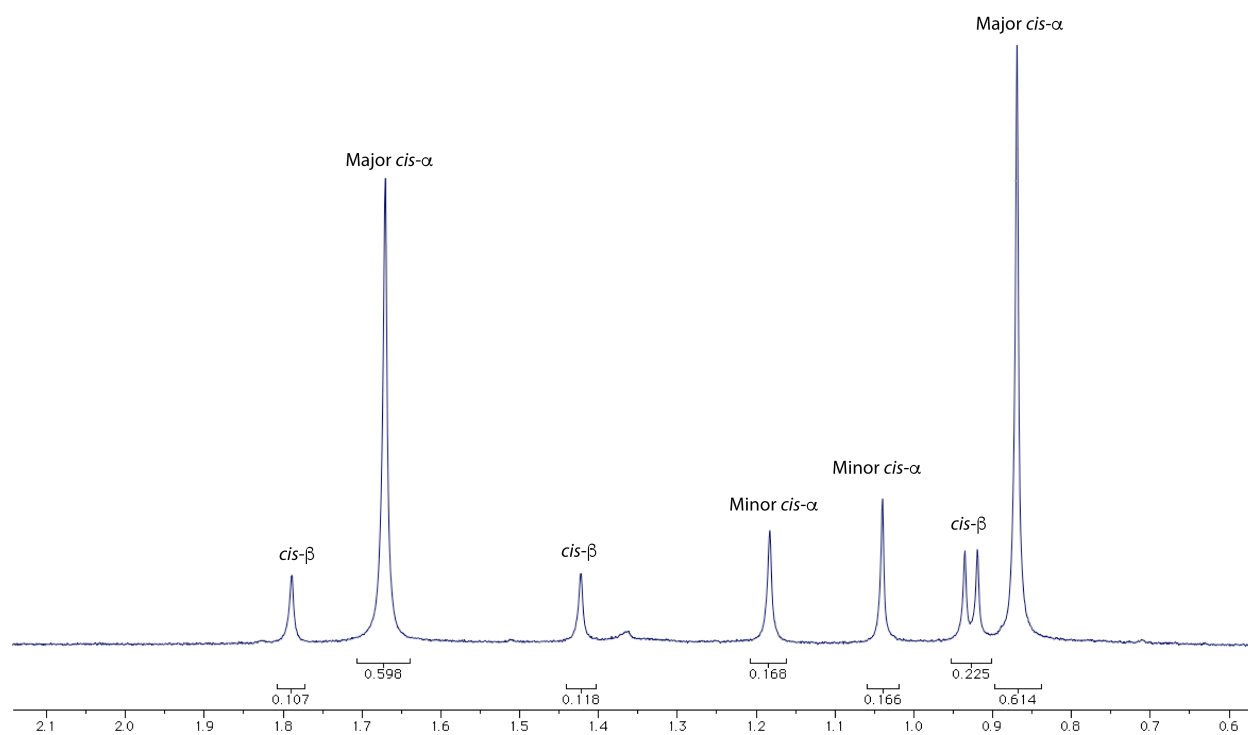

**II. Figure S2.** Thermal ellipsoid plot of  $C_2H_4(O_2CC_6H_4-2-NH_2)_2$ 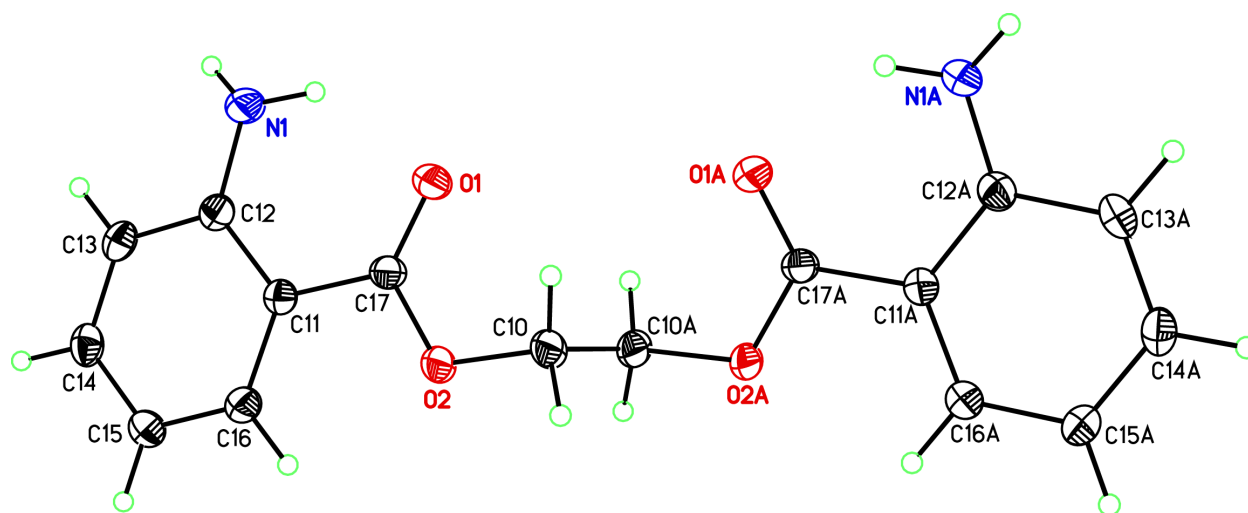

### III. Optical Spectroscopy

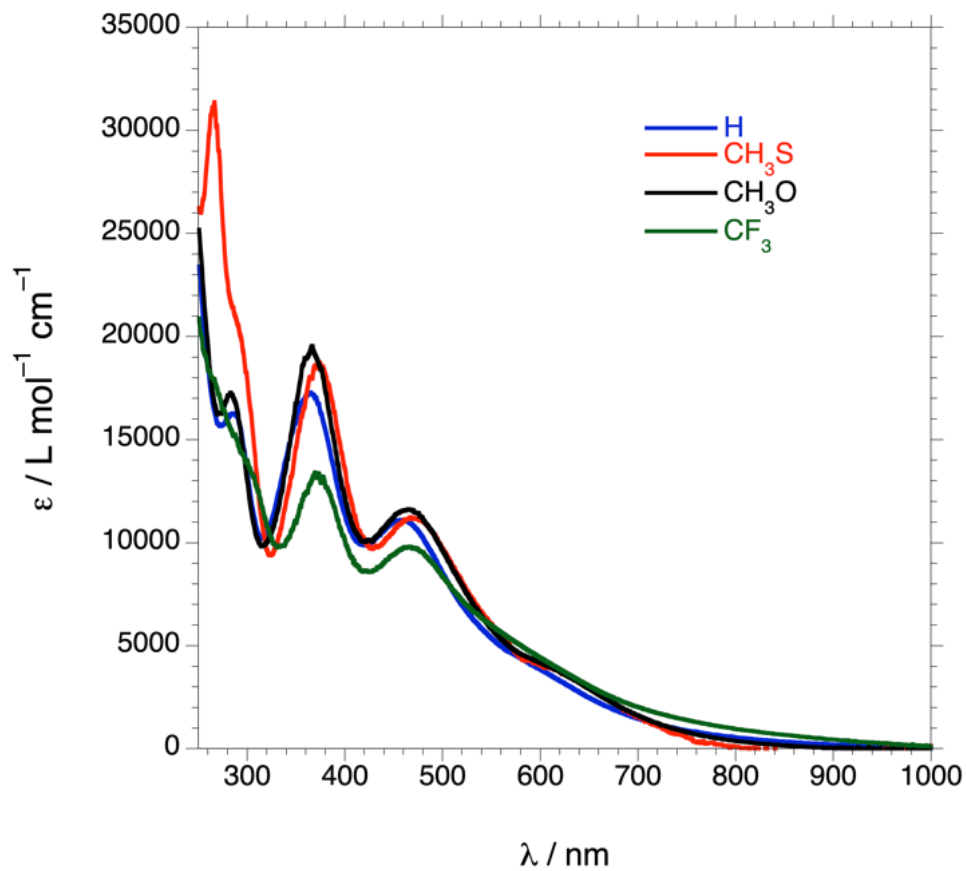

- A. Figure S3. UV-visible spectra of  $(^R\text{ap})_2\text{OsO}$  in  $\text{CH}_2\text{Cl}_2$ . R = H (blue trace),  $\text{CH}_3\text{S}$  (red trace),  $\text{CH}_3\text{O}$  (black trace) and  $\text{CF}_3$  (green trace).

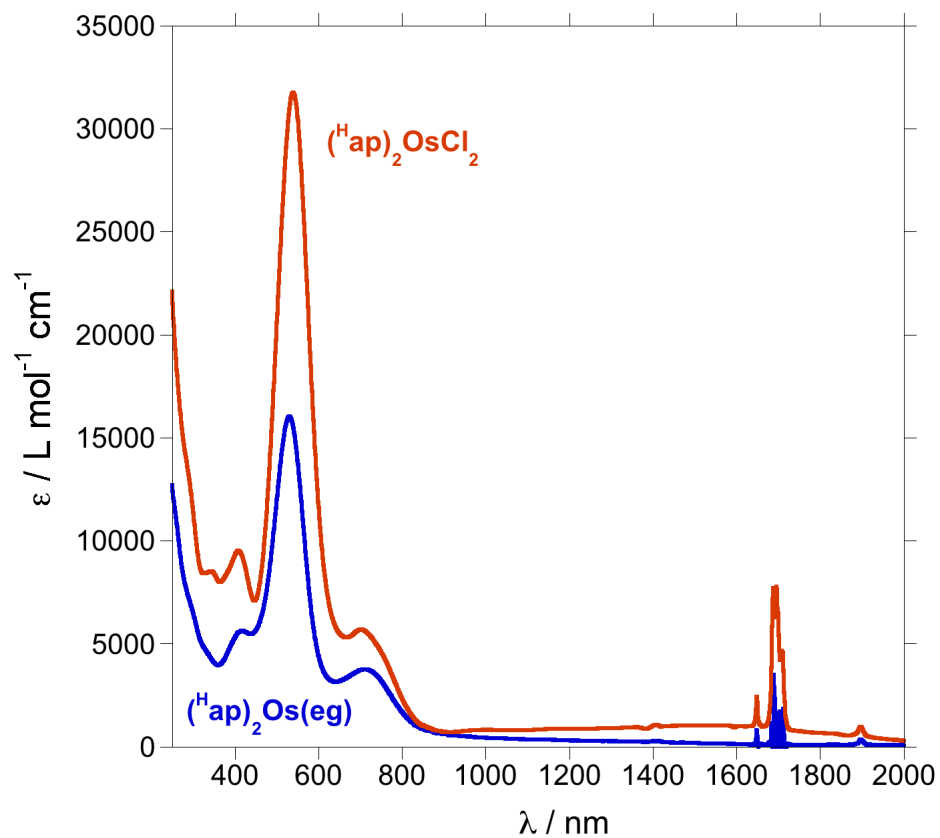

**B.** Figure S4. UV-visible-NIR spectra of  $(^{\text{Hap}})_2\text{Os}(\text{OCH}_2\text{CH}_2\text{O})$  (blue trace) and  $(^{\text{Hap}})_2\text{OsCl}_2$  (red trace) in  $\text{CH}_2\text{Cl}_2$ .

## IV. Electrochemistry

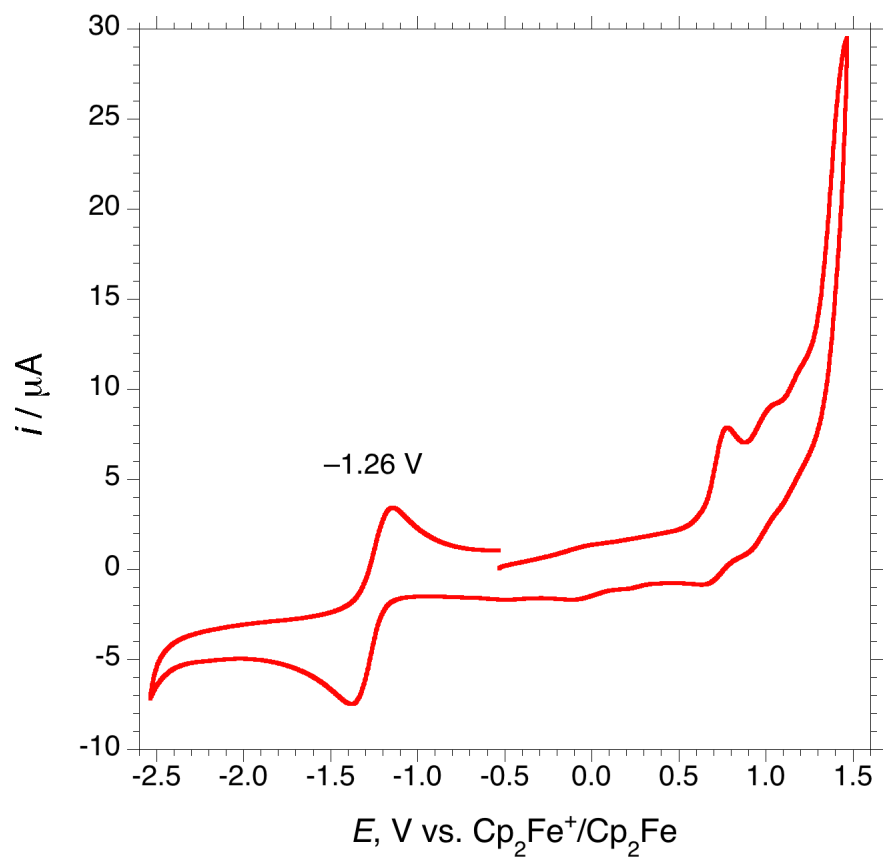

A. **Figure S5.** Cyclic voltammogram ( $\text{CH}_2\text{Cl}_2$ ,  $0.1 \text{ M Bu}_4\text{NPF}_6$  supporting electrolyte,  $100 \text{ mV s}^{-1}$ ) of (Egan)OsO.

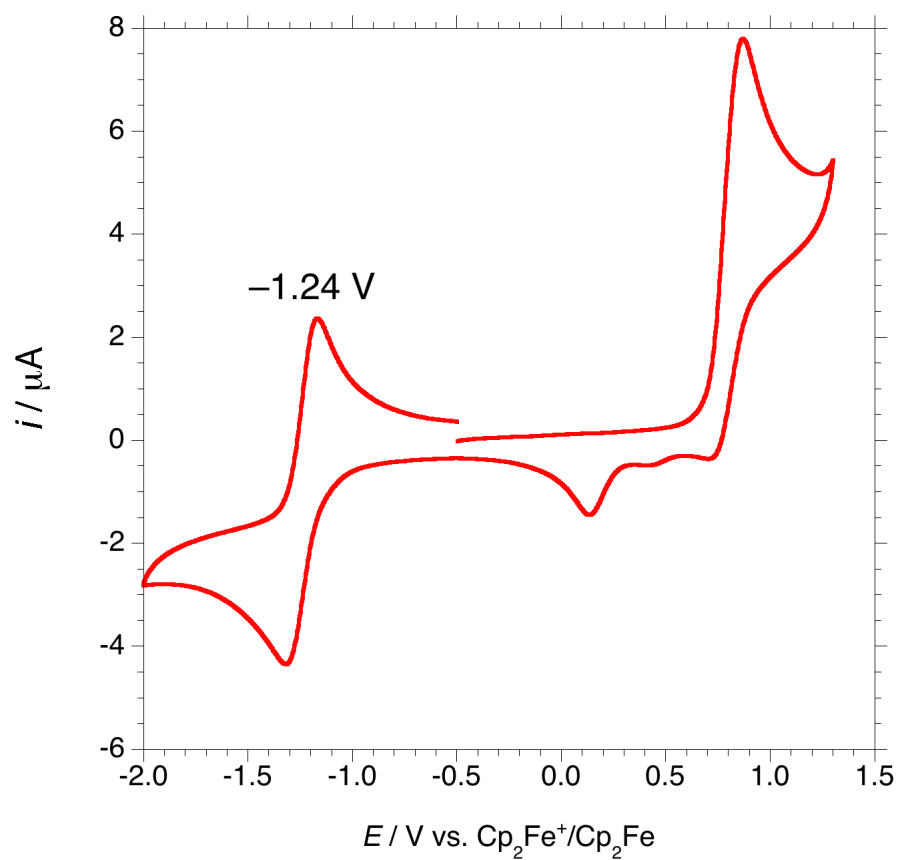

**B. Figure S6.** Cyclic voltammogram ( $\text{CH}_2\text{Cl}_2$ , 0.1 M  $\text{Bu}_4\text{NPF}_6$  supporting electrolyte,  $60 \text{ mV s}^{-1}$ ) of  $(^{\text{Hap}})\text{OsO}(\text{pin})$ .

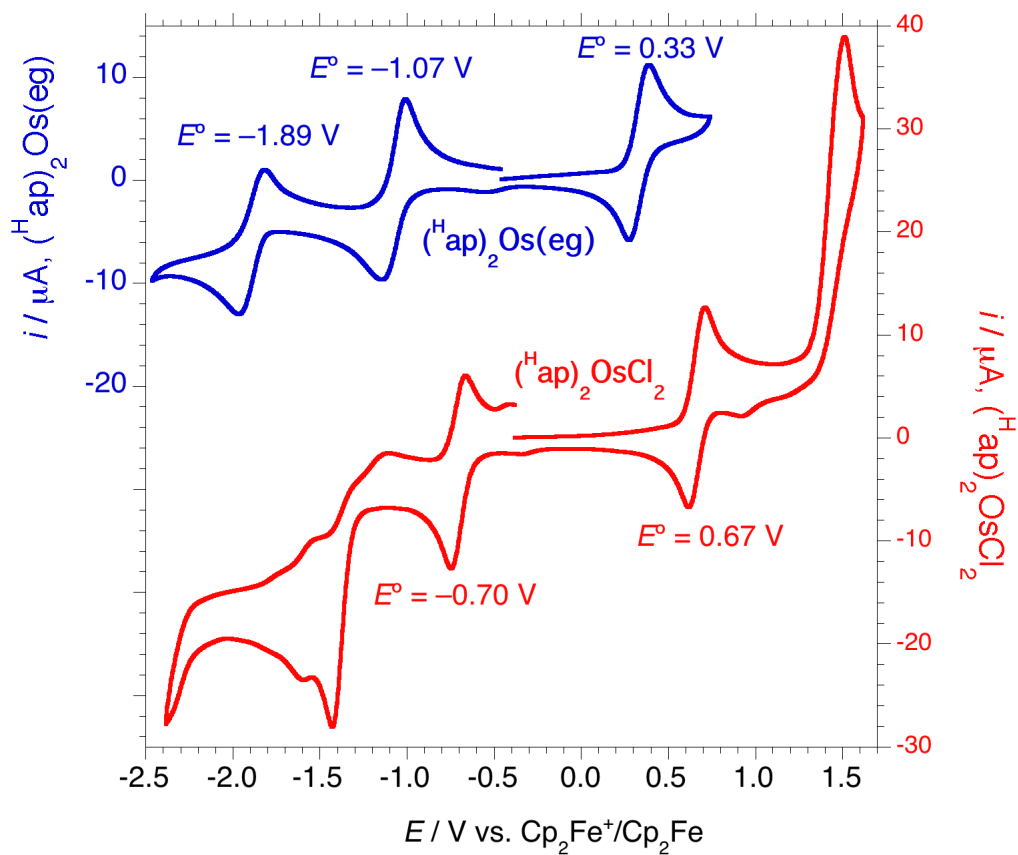

C. **Figure S7.** Cyclic voltammogram ( $\text{CH}_2\text{Cl}_2$ , 0.1 M  $\text{Bu}_4\text{NPF}_6$  supporting electrolyte,  $60 \text{ mV s}^{-1}$ ) of  $(^{\text{H}}\text{ap})_2\text{Os}(\text{OCH}_2\text{CH}_2\text{O})$  (blue trace, left y-axis) and  $(^{\text{H}}\text{ap})_2\text{OsCl}_2$  (red trace, right y-axis).



## V. Energies and Cartesian coordinates of calculated structures

### A. (<sup>H</sup>ap)<sub>2</sub>OsO

Energy of optimized structure = -1351.33865947 a.u.

Cartesian coordinates of optimized structure:

| Center<br>Number | Atomic<br>Number | Coordinates (Å) |           |           |
|------------------|------------------|-----------------|-----------|-----------|
|                  |                  | X               | Y         | Z         |
| 1                | 76               | -0.000000       | 0.000006  | 0.671356  |
| 2                | 8                | -0.000091       | 0.000098  | 2.392331  |
| 3                | 8                | -0.326220       | -1.784233 | -0.067532 |
| 4                | 7                | 1.848492        | -0.473242 | 0.122049  |
| 5                | 6                | 0.791767        | -2.501955 | -0.372667 |
| 6                | 6                | 2.009814        | -1.804074 | -0.302634 |
| 7                | 6                | 3.203647        | -2.471981 | -0.606974 |
| 8                | 1                | 4.153113        | -1.952520 | -0.539311 |
| 9                | 6                | 3.151922        | -3.816356 | -0.979647 |
| 10               | 1                | 4.076508        | -4.338868 | -1.207599 |
| 11               | 6                | 1.930570        | -4.495522 | -1.057248 |
| 12               | 1                | 1.908030        | -5.540231 | -1.353385 |
| 13               | 6                | 0.735389        | -3.839212 | -0.753712 |
| 14               | 1                | -0.225774       | -4.340838 | -0.803740 |
| 15               | 6                | 2.901580        | 0.469476  | -0.035830 |
| 16               | 6                | 3.266473        | 1.266264  | 1.057971  |
| 17               | 1                | 2.746648        | 1.135783  | 2.002253  |
| 18               | 6                | 4.286385        | 2.207901  | 0.926538  |
| 19               | 1                | 4.565092        | 2.819225  | 1.780387  |
| 20               | 6                | 4.947125        | 2.363861  | -0.293819 |
| 21               | 1                | 5.741329        | 3.098357  | -0.394590 |
| 22               | 6                | 4.579959        | 1.574282  | -1.387523 |
| 23               | 1                | 5.082944        | 1.698383  | -2.342723 |
| 24               | 6                | 3.560866        | 0.631962  | -1.264538 |
| 25               | 1                | 3.263648        | 0.026354  | -2.115179 |
| 26               | 8                | 0.326206        | 1.784173  | -0.067610 |
| 27               | 7                | -1.848483       | 0.473235  | 0.122194  |
| 28               | 6                | -0.791775       | 2.501903  | -0.372727 |
| 29               | 6                | -2.009817       | 1.804075  | -0.302550 |
| 30               | 6                | -3.203658       | 2.471992  | -0.606807 |
| 31               | 1                | -4.153097       | 1.952585  | -0.539027 |
| 32               | 6                | -3.151926       | 3.816348  | -0.979565 |
| 33               | 1                | -4.076520       | 4.338874  | -1.207445 |
| 34               | 6                | -1.930568       | 4.495462  | -1.057329 |
| 35               | 1                | -1.908012       | 5.540153  | -1.353531 |
| 36               | 6                | -0.735380       | 3.839116  | -0.753868 |
| 37               | 1                | 0.225796        | 4.340705  | -0.804007 |
| 38               | 6                | -2.901550       | -0.469485 | -0.035779 |
| 39               | 6                | -3.560855       | -0.631826 | -1.264500 |
| 40               | 1                | -3.263674       | -0.026148 | -2.115024 |
| 41               | 6                | -4.579952       | -1.574134 | -1.387572 |
| 42               | 1                | -5.082947       | -1.698131 | -2.342783 |
| 43               | 6                | -4.947112       | -2.363826 | -0.293946 |
| 44               | 1                | -5.741313       | -3.098306 | -0.394789 |
| 45               | 6                | -4.286359       | -2.207997 | 0.926421  |

|    |   |           |           |          |
|----|---|-----------|-----------|----------|
| 46 | 1 | -4.565062 | -2.819408 | 1.780210 |
| 47 | 6 | -3.266434 | -1.266387 | 1.057944 |
| 48 | 1 | -2.746608 | -1.136018 | 2.002207 |

---

**B.** (<sup>H</sup>ap)<sub>2</sub>Os(OCH<sub>2</sub>CH<sub>2</sub>O) (*cis*- $\alpha$ , N trans)

Energy of optimized structure = -1505.17064076 a.u.

Cartesian coordinates of optimized structure:

---

| Center<br>Number | Atomic<br>Number | Coordinates (Å) |           |           |
|------------------|------------------|-----------------|-----------|-----------|
|                  |                  | X               | Y         | Z         |
| 1                | 76               | -0.000010       | -0.000039 | 0.461794  |
| 2                | 8                | 0.315155        | 1.616529  | -0.708657 |
| 3                | 7                | -1.873295       | 0.536194  | 0.009334  |
| 4                | 8                | -0.315041       | -1.616558 | -0.708753 |
| 5                | 7                | 1.873329        | -0.536186 | 0.009399  |
| 6                | 8                | -0.543624       | -1.144944 | 1.981429  |
| 7                | 8                | 0.543437        | 1.144658  | 1.981637  |
| 8                | 6                | 0.004229        | -0.765007 | 3.225339  |
| 9                | 1                | 1.039787        | -1.130687 | 3.328531  |
| 10               | 1                | -0.606192       | -1.194786 | 4.030884  |
| 11               | 6                | -0.004680       | 0.764622  | 3.225406  |
| 12               | 1                | -1.040257       | 1.130299  | 3.328417  |
| 13               | 1                | 0.605581        | 1.194336  | 4.031108  |
| 14               | 6                | -0.759551       | 2.318662  | -1.014524 |
| 15               | 6                | -2.010352       | 1.735208  | -0.670579 |
| 16               | 6                | -3.210143       | 2.386108  | -1.025152 |
| 17               | 1                | -4.165100       | 1.945827  | -0.760093 |
| 18               | 6                | -3.144961       | 3.605897  | -1.681784 |
| 19               | 1                | -4.063929       | 4.126413  | -1.935068 |
| 20               | 6                | -1.901588       | 4.184861  | -2.013055 |
| 21               | 1                | -1.877650       | 5.140845  | -2.528778 |
| 22               | 6                | -0.710951       | 3.553389  | -1.686536 |
| 23               | 1                | 0.255918        | 3.979200  | -1.934706 |
| 24               | 6                | 0.759701        | -2.318641 | -1.014596 |
| 25               | 6                | 2.010464        | -1.735152 | -0.670579 |
| 26               | 6                | 3.210295        | -2.385984 | -1.025139 |
| 27               | 1                | 4.165225        | -1.945676 | -0.760021 |
| 28               | 6                | 3.145188        | -3.605749 | -1.681823 |
| 29               | 1                | 4.064187        | -4.126214 | -1.935100 |
| 30               | 6                | 1.901851        | -4.184756 | -2.013152 |
| 31               | 1                | 1.877972        | -5.140724 | -2.528909 |
| 32               | 6                | 0.711175        | -3.553350 | -1.686648 |
| 33               | 1                | -0.255666       | -3.979198 | -1.934860 |
| 34               | 6                | -2.983286       | -0.363901 | 0.020263  |
| 35               | 6                | -3.558732       | -0.786120 | -1.188156 |
| 36               | 1                | -3.147077       | -0.429509 | -2.126834 |
| 37               | 6                | -4.636121       | -1.670090 | -1.174812 |
| 38               | 1                | -5.071412       | -1.999718 | -2.114251 |
| 39               | 6                | -5.151001       | -2.131759 | 0.038964  |
| 40               | 1                | -5.992680       | -2.818849 | 0.047976  |
| 41               | 6                | -4.577156       | -1.710387 | 1.240965  |

|    |   |           |           |           |
|----|---|-----------|-----------|-----------|
| 42 | 1 | -4.973306 | -2.066329 | 2.188002  |
| 43 | 6 | -3.491480 | -0.836234 | 1.236380  |
| 44 | 1 | -3.027671 | -0.518261 | 2.161257  |
| 45 | 6 | 2.983270  | 0.363966  | 0.020387  |
| 46 | 6 | 3.491379  | 0.836323  | 1.236531  |
| 47 | 1 | 3.027537  | 0.518332  | 2.161370  |
| 48 | 6 | 4.577010  | 1.710532  | 1.241166  |
| 49 | 1 | 4.973096  | 2.066495  | 2.188221  |
| 50 | 6 | 5.150889  | 2.131936  | 0.039192  |
| 51 | 1 | 5.992537  | 2.819064  | 0.048247  |
| 52 | 6 | 4.636086  | 1.670250  | -1.174611 |
| 53 | 1 | 5.071398  | 1.999913  | -2.114028 |
| 54 | 6 | 3.558743  | 0.786225  | -1.188006 |
| 55 | 1 | 3.147140  | 0.429605  | -2.126704 |

C. (<sup>H</sup>ap)<sub>2</sub>OsCl<sub>2</sub> (*cis*- $\alpha$ , O *trans*)

Energy of optimized structure = -2196.55203488 a.u.

Cartesian coordinates of optimized structure:

| Center<br>Number | Atomic<br>Number | Coordinates (Å) |           |           |
|------------------|------------------|-----------------|-----------|-----------|
|                  |                  | X               | Y         | Z         |
| 1                | 76               | 0.000000        | 0.000000  | 1.046030  |
| 2                | 8                | -1.015893       | 1.759913  | 0.995828  |
| 3                | 7                | 1.081372        | 1.049539  | -0.276616 |
| 4                | 17               | 1.403916        | 0.901809  | 2.757555  |
| 5                | 6                | -0.340082       | 2.741173  | 0.481236  |
| 6                | 6                | 0.847873        | 2.390433  | -0.259100 |
| 7                | 6                | 1.610843        | 3.410487  | -0.889330 |
| 8                | 1                | 2.523845        | 3.155393  | -1.414856 |
| 9                | 6                | 1.188801        | 4.716619  | -0.788874 |
| 10               | 1                | 1.776809        | 5.507314  | -1.244982 |
| 11               | 6                | 0.000000        | 5.055080  | -0.082003 |
| 12               | 1                | -0.299057       | 6.097823  | -0.023613 |
| 13               | 6                | -0.762828       | 4.092343  | 0.539855  |
| 14               | 1                | -1.663025       | 4.332343  | 1.095541  |
| 15               | 6                | 2.052009        | 0.507220  | -1.169807 |
| 16               | 6                | 3.096051        | -0.274421 | -0.656094 |
| 17               | 1                | 3.159460        | -0.434527 | 0.413869  |
| 18               | 6                | 4.039513        | -0.814614 | -1.528713 |
| 19               | 1                | 4.857046        | -1.407409 | -1.128467 |
| 20               | 6                | 3.938420        | -0.599527 | -2.905891 |
| 21               | 1                | 4.673072        | -1.030845 | -3.579968 |
| 22               | 6                | 2.888928        | 0.169617  | -3.414695 |
| 23               | 1                | 2.799944        | 0.334009  | -4.484959 |
| 24               | 6                | 1.947883        | 0.730418  | -2.551931 |
| 25               | 1                | 1.124107        | 1.322794  | -2.938340 |
| 26               | 8                | 1.015893        | -1.759913 | 0.995828  |
| 27               | 7                | -1.081372       | -1.049539 | -0.276616 |
| 28               | 17               | -1.403916       | -0.901809 | 2.757555  |
| 29               | 6                | 0.340082        | -2.741173 | 0.481236  |
| 30               | 6                | -0.847873       | -2.390433 | -0.259100 |

|    |   |           |           |           |
|----|---|-----------|-----------|-----------|
| 31 | 6 | -1.610843 | -3.410487 | -0.889330 |
| 32 | 1 | -2.523845 | -3.155393 | -1.414856 |
| 33 | 6 | -1.188801 | -4.716619 | -0.788874 |
| 34 | 1 | -1.776809 | -5.507314 | -1.244982 |
| 35 | 6 | -0.000000 | -5.055080 | -0.082003 |
| 36 | 1 | 0.299057  | -6.097823 | -0.023613 |
| 37 | 6 | 0.762828  | -4.092343 | 0.539855  |
| 38 | 1 | 1.663025  | -4.332343 | 1.095541  |
| 39 | 6 | -2.052009 | -0.507220 | -1.169807 |
| 40 | 6 | -3.096051 | 0.274421  | -0.656094 |
| 41 | 1 | -3.159460 | 0.434527  | 0.413869  |
| 42 | 6 | -4.039513 | 0.814614  | -1.528713 |
| 43 | 1 | -4.857046 | 1.407409  | -1.128467 |
| 44 | 6 | -3.938420 | 0.599527  | -2.905891 |
| 45 | 1 | -4.673072 | 1.030845  | -3.579968 |
| 46 | 6 | -2.888928 | -0.169617 | -3.414695 |
| 47 | 1 | -2.799944 | -0.334009 | -4.484959 |
| 48 | 6 | -1.947883 | -0.730418 | -2.551931 |
| 49 | 1 | -1.124107 | -1.322794 | -2.938340 |

#### D. (<sup>H</sup>ap)OsO(OCH<sub>2</sub>CH<sub>2</sub>O)

Energy of optimized structure = -987.712877450 a.u.

Cartesian coordinates of optimized structure:

| Center<br>Number | Atomic<br>Number | Coordinates (Å) |           |           |
|------------------|------------------|-----------------|-----------|-----------|
|                  |                  | X               | Y         | Z         |
| 1                | 76               | -1.106113       | -0.221203 | 0.302731  |
| 2                | 8                | -1.457796       | -0.159790 | 1.971398  |
| 3                | 8                | -0.581930       | -2.037847 | -0.180918 |
| 4                | 7                | 0.842801        | 0.045675  | 0.180388  |
| 5                | 6                | 0.759865        | -2.269852 | -0.176537 |
| 6                | 6                | 1.579812        | -1.141876 | 0.001153  |
| 7                | 6                | 2.971815        | -1.296185 | 0.018697  |
| 8                | 1                | 3.615982        | -0.438230 | 0.175748  |
| 9                | 6                | 3.512955        | -2.571641 | -0.153516 |
| 10               | 1                | 4.591664        | -2.696478 | -0.132598 |
| 11               | 6                | 2.686152        | -3.684095 | -0.347545 |
| 12               | 1                | 3.123992        | -4.668624 | -0.483531 |
| 13               | 6                | 1.297022        | -3.540199 | -0.363413 |
| 14               | 1                | 0.631863        | -4.385340 | -0.508276 |
| 15               | 6                | 1.477185        | 1.315164  | 0.077916  |
| 16               | 6                | 1.273485        | 2.261114  | 1.091040  |
| 17               | 1                | 0.642576        | 2.002945  | 1.936180  |
| 18               | 6                | 1.880145        | 3.513505  | 1.007748  |
| 19               | 1                | 1.720823        | 4.240370  | 1.799319  |
| 20               | 6                | 2.688110        | 3.832716  | -0.085864 |
| 21               | 1                | 3.158955        | 4.809707  | -0.149569 |

|    |   |           |           |           |
|----|---|-----------|-----------|-----------|
| 22 | 6 | 2.885159  | 2.892614  | -1.101274 |
| 23 | 1 | 3.504048  | 3.138643  | -1.959811 |
| 24 | 6 | 2.282251  | 1.638481  | -1.025087 |
| 25 | 1 | 2.424099  | 0.909059  | -1.816655 |
| 26 | 8 | -1.300273 | 1.484705  | -0.580442 |
| 27 | 8 | -2.705517 | -0.618782 | -0.731022 |
| 28 | 6 | -2.456227 | 1.638882  | -1.420914 |
| 29 | 6 | -3.457130 | 0.556399  | -1.051319 |
| 30 | 1 | -2.127414 | 1.543015  | -2.464177 |
| 31 | 1 | -2.850544 | 2.649957  | -1.267082 |
| 32 | 1 | -4.056386 | 0.852330  | -0.178662 |
| 33 | 1 | -4.134124 | 0.317927  | -1.879777 |

---

### E. (Egan)OsO

Energy of optimized structure = -1805.87873909 a.u.

Cartesian coordinates of optimized structure:

| Center<br>Number | Atomic<br>Number | Coordinates (Å) |           |           |
|------------------|------------------|-----------------|-----------|-----------|
|                  |                  | X               | Y         | Z         |
| 1                | 76               | 0.000000        | 0.000000  | 1.304199  |
| 2                | 8                | 0.000000        | 0.000000  | 3.021914  |
| 3                | 8                | -0.664480       | -1.738176 | 0.685562  |
| 4                | 7                | 1.693931        | -0.789039 | 0.674578  |
| 5                | 6                | 0.293673        | -2.629141 | 0.312230  |
| 6                | 8                | 0.664480        | 1.738176  | 0.685562  |
| 7                | 7                | -1.693931       | 0.789039  | 0.674578  |
| 8                | 6                | -0.293673       | 2.629141  | 0.312230  |
| 9                | 6                | 1.608755        | -2.135416 | 0.274812  |
| 10               | 6                | -1.608755       | 2.135416  | 0.274812  |
| 11               | 8                | -1.386708       | 0.097179  | -2.042195 |
| 12               | 8                | 1.386708        | -0.097179 | -2.042195 |
| 13               | 6                | 2.655265        | -2.976729 | -0.119567 |
| 14               | 1                | 3.675674        | -2.609734 | -0.147010 |
| 15               | 6                | -2.655265       | 2.976729  | -0.119567 |
| 16               | 1                | -3.675674       | 2.609734  | -0.147010 |
| 17               | 6                | 2.364255        | -4.298230 | -0.467774 |
| 18               | 1                | 3.173308        | -4.956789 | -0.769778 |
| 19               | 6                | -2.364255       | 4.298230  | -0.467774 |
| 20               | 1                | -3.173308       | 4.956789  | -0.769778 |
| 21               | 6                | 1.050753        | -4.778604 | -0.431524 |
| 22               | 1                | 0.841796        | -5.808067 | -0.707418 |
| 23               | 6                | -1.050753       | 4.778604  | -0.431524 |
| 24               | 1                | -0.841796       | 5.808067  | -0.707418 |
| 25               | 6                | -0.000000       | -3.942071 | -0.044835 |
| 26               | 1                | -1.028157       | -4.288459 | -0.011560 |

|    |   |           |           |           |
|----|---|-----------|-----------|-----------|
| 27 | 6 | 0.000000  | 3.942071  | -0.044835 |
| 28 | 1 | 1.028157  | 4.288459  | -0.011560 |
| 29 | 6 | -2.895730 | 0.057335  | 0.446042  |
| 30 | 6 | 2.895730  | -0.057335 | 0.446042  |
| 31 | 6 | -3.412767 | -0.201113 | -0.843785 |
| 32 | 6 | 3.412767  | 0.201113  | -0.843785 |
| 33 | 6 | -4.651010 | -0.846957 | -0.963071 |
| 34 | 1 | -5.043655 | -1.014279 | -1.960590 |
| 35 | 6 | 4.651010  | 0.846957  | -0.963071 |
| 36 | 1 | 5.043655  | 1.014279  | -1.960590 |
| 37 | 6 | -5.351160 | -1.277132 | 0.161515  |
| 38 | 1 | -6.302361 | -1.788196 | 0.045347  |
| 39 | 6 | 5.351160  | 1.277132  | 0.161515  |
| 40 | 1 | 6.302361  | 1.788196  | 0.045347  |
| 41 | 6 | -4.820604 | -1.050609 | 1.432384  |
| 42 | 1 | -5.354343 | -1.383482 | 2.318076  |
| 43 | 6 | 4.820604  | 1.050609  | 1.432384  |
| 44 | 1 | 5.354343  | 1.383482  | 2.318076  |
| 45 | 6 | -3.606144 | -0.380269 | 1.569789  |
| 46 | 1 | -3.192990 | -0.173215 | 2.552235  |
| 47 | 6 | 3.606144  | 0.380269  | 1.569789  |
| 48 | 1 | 3.192990  | 0.173215  | 2.552235  |
| 49 | 6 | 0.632359  | -0.413965 | -3.226692 |
| 50 | 1 | 0.401216  | -1.484067 | -3.206589 |
| 51 | 1 | 1.232670  | -0.194937 | -4.113454 |
| 52 | 6 | -0.632359 | 0.413965  | -3.226692 |
| 53 | 1 | -0.401216 | 1.484067  | -3.206589 |
| 54 | 1 | -1.232670 | 0.194937  | -4.113454 |
| 55 | 6 | -2.734756 | 0.143153  | -2.133099 |
| 56 | 6 | 2.734756  | -0.143153 | -2.133099 |
| 57 | 8 | -3.332755 | 0.375484  | -3.164336 |
| 58 | 8 | 3.332755  | -0.375484 | -3.164336 |

---
